# Supplementary material for: Laboratory and clinical trials of cocamide diethanolamine lotion against head lice
Source: PeerJ. 2015 Nov 3;3:e1368. doi: 10.7717/peerj.1368 (PMC4636399; doi:10.7717/peerj.1368)
Supplement: Data S1 [file peerj-03-1368-s004.xlsx]

## Sheet: Sheet1
number	initials	age	sex	number in house	number checked	number +ve	number enrolled	Hair Length	Thickness	Curl	Type	infestation	treatment	outcome
001	LS	8	F	4			2	B	A	S	N	M	1	TF	WD
002	DS	10	F	4			2	B	A	S	N	L	2	TF
003	BH	10	M	6			2	A	T	S	N	L	2	OF
004	LH	8	F	6			2	E	T	S	D	H	1	OF
005	AST	10	F	4			1	E	A	S	N	M	2	TF
006	GB	6	F	3			3	B	F	S	N	H	2	TF
007	NB	9	F	3			3	B	T	S	N	M	1	TF
008	SB	28	F	3			3	E	A	S	N	M	1	TF
009	JP	39	F	3			1	E	F	S	N	L	1	R
010	JMB	8	F	5			2	E	T	W	N	M	2	TF
011	LB	37	F	5			2	E	T	W	N	L	1	TF
012	CS	12	F	3			3	E	A	S	G	M	2	TF
013	RS	9	M	3			3	A	F	S	N	M	1	TF
014	JS	39	F	3			3	E	T	C	N	L	2	TF
015	CO	7	F	4			2	E	T	S	N	M	2	C
016	HO	26	F	4			2	E	T	S	N	M	1	TF
017	SD	10	M	5			1	A	T	W	N	L	2	OF
018	BJ	4	F	5			3	B	F	S	D	M	1	OF
019	CJ	7	M	5			3	A	F	S	N	M	1	OF
020	JJ	9	M	5			3	A	T	S	D	M	2	OF
021	MP	43	F	7			2	E	T	W	D	L	2	C
022	SP	13	F	7			2	B	T	S	N	L	1	TF
023	SC	7	F	5			1	B	F	S	N	L	1	R
024	MP	9	F	3			1	B	T	S	N	L	2		LTF
025	NLW	10	F	4			3	B	T	W	N	L	2	C
026	DMW	30	F	4			3	B	A	S	D	L	1	OF
027	RLW	9	F	4			3	B	A	W	N	H	2	C
028	JB	8	M	6			2	E	A	S	D	L	1	TF
029	LB	6	F	6			2	B	F	S	D	L	2	TF
030	LA	7	F	7			3	E	A	W	N	M	2	TF
031	KM	10	F	6			1	B	T	S	N	H	1	TF	WD
032	KA	9	F	7			3	E	A	C	N	L	1	TF
033	KC	11	F	8			4	A	A	S	N		1	TF
034	DR	4	F	8			4	B	F	S	N		2	TF	WD
035	GC	12	M	8			4	A	A	S	N	L	2	TF
036	SC	14	F	8			4	E	T	S	N	L	1	C
037
038	AA	9	F	7			3	B	A	W	N	L	1	TF
039
040	RM	8	M	4			1	A	A	S	N	L	2	C
041	LN	8	F	5			2	E	T	S	N	L	2	TF	WD
042	EN	5	F	5			2	B	A	S	N	L	1	TF
043
044
045
046
047
048
049	TH	9	F	5			4	B	A	S	N	L	1	TF	WD
050	NH	12	F	5			4	B	F	S	N	M	1	TF	WD
051	KH	34	M	5			4	B	T	W	N	M	2	TF
052	MC	26	F	5			4	B	F	S	N	L	1	TF
053
054													1 CDEA		WD = withdrawn
													2 PER		LTF = lost to follow up
														C = Cure
														R = Reinfestation
														OF = Ovicidal failure
														TF = Treatment failure
